## A generator of morphological clones for plant species

Ilya Potapov<sup>1</sup>, Marko Järvenpää<sup>2</sup>, Markku Åkerblom<sup>1</sup>, Pasi Raumonon<sup>1</sup>, Mikko Kaasalainen<sup>1</sup>

<sup>1</sup>Mathematics Department, Tampere University of Technology, P.O. Box 553, 33101, Tampere,  
Finland

<sup>2</sup>Helsinki Institute for Information Technology, Department of Computer Science, Aalto University,  
Finland

Correspondence: [ilya.potapov@tut.fi](mailto:ilya.potapov@tut.fi)

Keywords: stochastic structure tree model; quantitative structure tree model; morphological clone;  
terrestrial laser scanning

### 11 **Summary Statement.**

12 We present an algorithmic framework, based on the Bayesian inference, for generating morphological  
13 tree clones using a combination of stochastic growth models and experimentally derived tree  
14 structures.

### 16 **Abstract.**

17 Detailed and realistic tree form generators have numerous applications in ecology and forestry. Here,  
18 we present an algorithm for generating morphological tree “clones” based on the detailed  
19 reconstruction of the laser scanning data, statistical measure of similarity, and a plant growth algorithm  
20 with simple stochastic rules. The algorithm is designed to produce tree forms, i.e. morphological  
21 clones, similar as a whole (coarse-grain scale), but varying in minute details of organization (fine-grain  
22 scale). We present a general procedure for obtaining these morphological clones. Although we opted  
23 for certain choices in our algorithm, its various parts may vary depending on the application. Namely,  
24 we have shown that specific multi-purpose procedural stochastic growth model can be algorithmically  
25 adjusted to produce the morphological clones replicated from the target experimentally measured tree.  
26 For this, we have developed a statistical measure of similarity (structural distance) between any given  
27 pair of trees, which allows for the comprehensive comparing of the tree morphologies in question by  
28 means of empirical distributions describing geometrical and topological features of a tree. Our  
29 algorithm can be used in variety of applications and contexts for exploration of the morphological  
30 potential of the growth models, arising in all sectors of plant science research.

## 34 **I. Introduction**

35

36 Models for plant architecture attract significant attention due to their ability to assist the empirical  
37 studies in ecology, plant biology, forestry, and agronomy (Prusinkiewicz, 2004). The modeling activity  
38 is especially useful in research since it arises as fruitful collaboration between specialists in different  
39 fields of studies: computer scientists, mathematicians, and biologists (Fourcaud et al., 2008).

40

41 Modeling plant architecture is approached from many directions. Some progress has been achieved in  
42 synthesis of realistic plant forms in the field of computer graphics (Palubicki et al., 2009; Pirk et al.,  
43 2012; Stava et al., 2014). These models, although based on heuristic rules of growth, produce realistic  
44 shape outcomes in a fast and efficient manner, which is usually dictated by the application of this  
45 approach, that is natural sceneries in computer visualization. Heuristic growth rules of the procedural  
46 models for graphics applications are not firmly based on biological principles, but nevertheless  
47 elucidate some algorithmic properties of the growth process (for example, recursive (Hallé et al., 1978)  
48 vs. self-organizing (Sachs and Novoplansky, 1995; Palubicki et al., 2009) character of architecture  
49 development).

50

51 However, the most promising plant architectural models are so called functional-structural plant  
52 models (FSPM), also known as “virtual plants” (Room et al., 1996; Sievänen et al., 2000; Godin et al.,  
53 2004), because this type of models allows for a balanced description between morphological and  
54 functional/physiological properties of a plant. Thus, it is capable of connecting the external abiotic  
55 factors (e.g. radiation, temperature and soil) and the most vital functions of a plant organism (such as  
56 photosynthesis, respiration, and water and salts uptake) with its structural characteristics  
57 (Prusinkiewicz, 2004; Fourcaud et al., 2008).

58

59 Nevertheless, biologically relevant architectural plant models rely on data in a form of empirically  
60 fitted functions and parameters that correspond to a particular species and/or certain site conditions  
61 (Mäkelä and Hari, 1986; Rauscher et al, 1990; Perttunen et al., 1996; Lacoïnte, 2000). Thus, the  
62 change in these conditions requires re-calibration of the models, which is done in a manual fashion  
63 every time the model is simulated for the new conditions. Strong dependence on data, where each  
64 simulation would be calibrated automatically by data, is limited by both computation time and lack of  
65 the fast measurement and processing systems allowing for a detailed 3D morphological reconstruction  
66 of the real plant/tree.

67

68 The most recent advances in laser scanning techniques allow for fast and non-destructive measurement  
69 of trees with subsequent reconstruction of various characteristics depending on application (e.g.  
70 (Rosell et al., 2009; Van Leeuwen and Nieuwenhuis, 2010)). Most of such studies dedicated to  
71 reconstruction of 3D point clouds obtained from laser scanning measurements deal with overall  
72 characteristics, such as height, width, and volume of stems/crowns, leaf index, biomass etc.,  
73 resembling traditional destructive methods of measurement (Rosell et al., 2009; Rutzinger et al., 2010).  
74 However, the detailed precise geometrical and topological reconstruction with the preserved tree  
75 architecture as is, is rarely sought after.

76

77 In this work, we use a fast, precise, automatic, and comprehensive reconstruction algorithm initially  
78 presented in (Raumonen et al., 2013) and further developed and tested in (Calders et al., 2015). The  
79 algorithm reliably reconstructs a quantitative structure model (QSM), which contains all geometrical  
80 and topological characteristics of the object tree. Input for the method is the 3D point cloud,  
81 sufficiently covering the tree, obtained from the terrestrial laser scanning measurements (TLS) and no  
82 additional allometric relations used for estimation of the branch proportions (as in (Xu et al., 2007;  
83 Livny et al., 2010)) are needed. Compared to other similar techniques (e.g. (Xu et al., 2007; Livny et  
84 al., 2010; Preuksakarn et al., 2010)) this method requires few parameters and no user interaction and  
85 reconstructs the tree surface with subsequent cylinder (or any other geometrical primitive)  
86 approximation, which is usually consistent with theoretical plant growth models. The reconstruction  
87 algorithm has been validated in several studies with several different tree species and different scanner  
88 instruments (Calders et al., 2015; Hackenberg et al., 2015; Kaasalainen et al., 2014; Raumonen et al.,  
89 2015; Smith et al., 2014). There are other published QSM reconstruction methods from TLS data that  
90 can produce similar quality QSMs, at least (Hackenberg et al., 2015).

91

92 In this work, we utilize an inverse iterative procedure to optimize model's parameters as to match the  
93 (empirical) distribution of structural features of the simulated stochastic tree models (FSPM, graphical  
94 or other) to that of the tree reconstructed from the laser scanning data. Meanwhile, we formulate a  
95 measure of similarity of the tree structures grounded in tomographic analysis of the structural  
96 distributions (e.g. Radon transform) (Kaasalainen, 2008; Bracewell, 1990). Finally, the optimal  
97 parameter set produces morphological "clone" trees with similar overall structure, but varying minute  
98 details of organization.

99

100 Recently, we have reported a proof-of-concept study where we used reconstruction of a pine tree and  
101 the corresponding FSPM (named LIGNUM (Perttunen et al., 1996; Sievanen et al., 2008)) to  
102 demonstrate the practical feasibility of the approach (Potapov et al., 2016). In this work, however, we  
103 develop a unifying interface for our procedure and use general-purpose fast procedural tree growth  
104 model from (Palubicki et al., 2009), since such a simple procedural model is easier to adapt (it is  
105 simple, fast, and efficient) for technical experimentation with the whole algorithm. Additionally,  
106 similar algorithmic pipeline was reported in (Stava et al, 2014) for procedural tree growth models in  
107 the context of graphics synthesis. However, in our approach we see the tree growth as a random  
108 process and, consequently, apply corresponding statistical methods for measuring the similarity  
109 between trees. Moreover, in our algorithm the special concern is on biologically relevant description,  
110 hence, the careful choice of the reconstruction algorithm; possibility to use FSPM to relate  
111 physiological parameters to the morphogenetic processes in trees; and no extra structures improving  
112 visual properties of trees but not supported by empirical observation (e.g. leaves).

113

## 114 **II. Results**

115

### 116 **Algorithm overview**

117

118 Our approach is based upon five distinct parts:

- 119 1. *Quantitative Structure Model (QSM)* is a reconstruction of a tree model from 3D point clouds  
120 obtained from terrestrial laser scanning measurements (TLS). Here we use specific algorithm for  
121 such reconstruction reported in (Raumonen et al., 2013) and (Calders et al., 2015) but others could  
122 be used as well.
- 123 2. *Stochastic Structure Model (SSM)* is a tree growth model that is chosen depending on the  
124 application. There are no limitations on the class of the model, except it must produce measurable  
125 3D branching structure.
- 126 3. *Structural data set ( $U$ )* is a collection of structural features (empirical distributions) to be  
127 compared between QSM and SSM. Importantly,  $U$  data sets must be determined in the same way  
128 both for QSM and SSM.
- 129 4. *Measure of structural dissimilarity, or structural distance  $D_S$* , is a measure of discrepancy between  
130 any two data sets, in other words,  $D_S(U_1, U_2)$  results in a value quantifying how much different the  
131 two data sets  $U_1$  and  $U_2$  are.

132 5. *Optimization algorithm* is a numerical routine capable of finding a minimum of any given function  
 133 by varying its arguments (Newton algorithm, genetic algorithm, simulated annealing etc.)  
 134  
 135 The connection between these components is outlined in Fig. 1 with explanation in the text below.

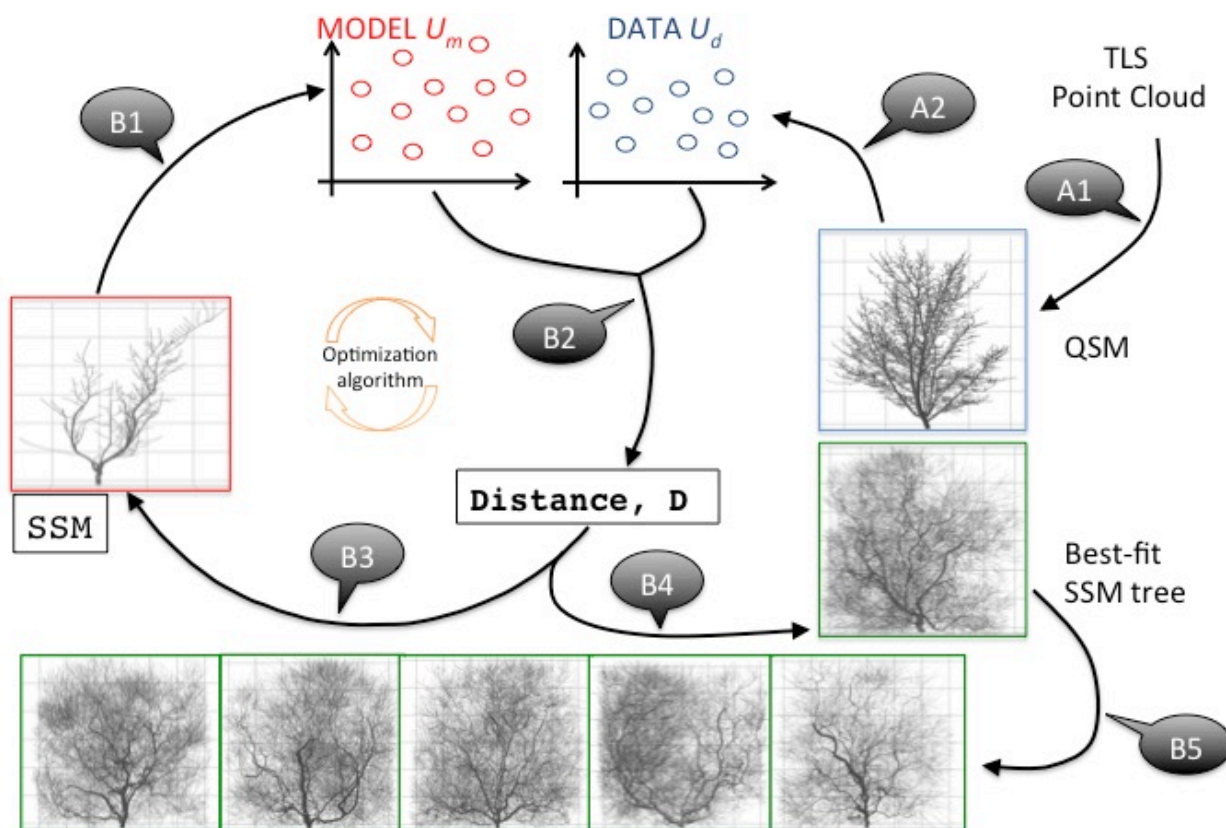

136

137 **Figure 1: The algorithm outline (see explanation in the text).**

138

139 The algorithm outline (Fig. 1):

140

141 Preparation stage A:

142 A1: build QSM from TLS.

143 A2: extract  $U_d$  from QSM.

144

145 Main cycle B:

146 B1: simulate SSM for the fixed parameters and extract  $U_m$ .

147 B2: compare  $U_m$  and  $U_d$  getting an estimation of the distance  $D$  between them.

148 B3: change SSM parameters trying to decrease  $D$ , go to B1 or stop and go to B4 (changing of the  
 149 parameters and stopping criteria depend on any particular realization of the optimization routine).

150 B4: simulate SSM with the “best-fit” parameter values corresponding to the smallest found  $D$ .

151 B5: loose the randomness of the best-fit SSM and generate morphological clones.

152

153 At the preparation stage, the QSM is formed from the TLS point cloud (A1). The detailed description  
154 of this process is reported in (Raumonen et al., 2013; Calders et al., 2015). The resultant QSM contains  
155 all geometrical and topological features needed to form the empirical distributions  $U_d$ . The  
156 distributions can be formed for several tree individuals if they are close by shape to ensure the sample  
157 size.

158

159 At the main cycle of the algorithm, the empirical distribution  $U_m$  is formed from the simulated SSM  
160 tree (B1). Next,  $U_m$  is compared against  $U_d$  using the measure of distance (B2). The optimization  
161 routine iteratively minimizes the distance value every time changing the parameter values of SSM  
162 (B3), simulating SSM, and repeating the cycle from B1. After the stopping criteria of the optimization  
163 routine (number of iterations, minimal allowed distance etc.) are met, the algorithm stops and produces  
164 the best-fit SSM tree (B4). The best-fit SSM with different random sequences produces different  
165 outcomes – morphological clones.

166

167 In Materials and methods, we describe each of the main components of the algorithm in further detail.

168

### 169 **Preliminary observations**

170

171 In the beginning of our analysis, we make several important notes about the target QSM structure. The  
172 shrub-like shape of this reconstruction model produces several major branches emanating from the  
173 initial part of the trunk connected to the ground. All these branches can be equally assigned with the  
174 order  $w = 0$  (continuation of the trunk; see the definition of the topological order  $w$  in Materials and  
175 methods), however, the heuristic algorithm of the tree reconstruction from the TLS data (Raumonen et  
176 al., 2013) at every branching point chooses the thickest pathway to determine the actual trunk (it is  
177 roughly the thickest pathway, although the actual algorithm specifies much more complicated rules,  
178 see (Raumonen et al., 2013) for details). This has the following implications.

179

180 First, tree with the zero and first order branches has a skewed shape (Fig. 2A), since only one of the  
181 trunk candidate branches becomes the actual trunk ( $w = 0$ ) whereas the rest of them become the first  
182 order branches ( $w = 1$ ). The asymmetry of the form appears due to the branches attached to the actual  
183 trunk and assigned with  $w = 1$ , because other similarly scaled and attached to other trunk candidates  
184 branches become effectively the branches of order  $w = 2$ . Second, due to the aforementioned

185 asymmetry the data sets for the first order branches have a modular structure: large scaled trunk-like  
186 branches along with the smaller ones. Third, we observe that the overall shape of the subject QSM can  
187 be approximated by the branches of the topological orders  $w \leq 2$  as it can be seen from Fig. 1B.  
188 Namely, with orders  $w = 0$  and 1 the shape of the tree seems to be underrepresented (mainly due to the  
189 shape asymmetry), while with orders  $w = 0, 1, 2$ , and 3 the smaller twigs just fill in the spatial gaps  
190 between the major branches. This makes the analysis and form fitting a more complex task as  
191 compared with the tree shapes resulting from the growth with strong apical dominance (e.g. pine trees;  
192 see (Potapov et al., 2016)).

193

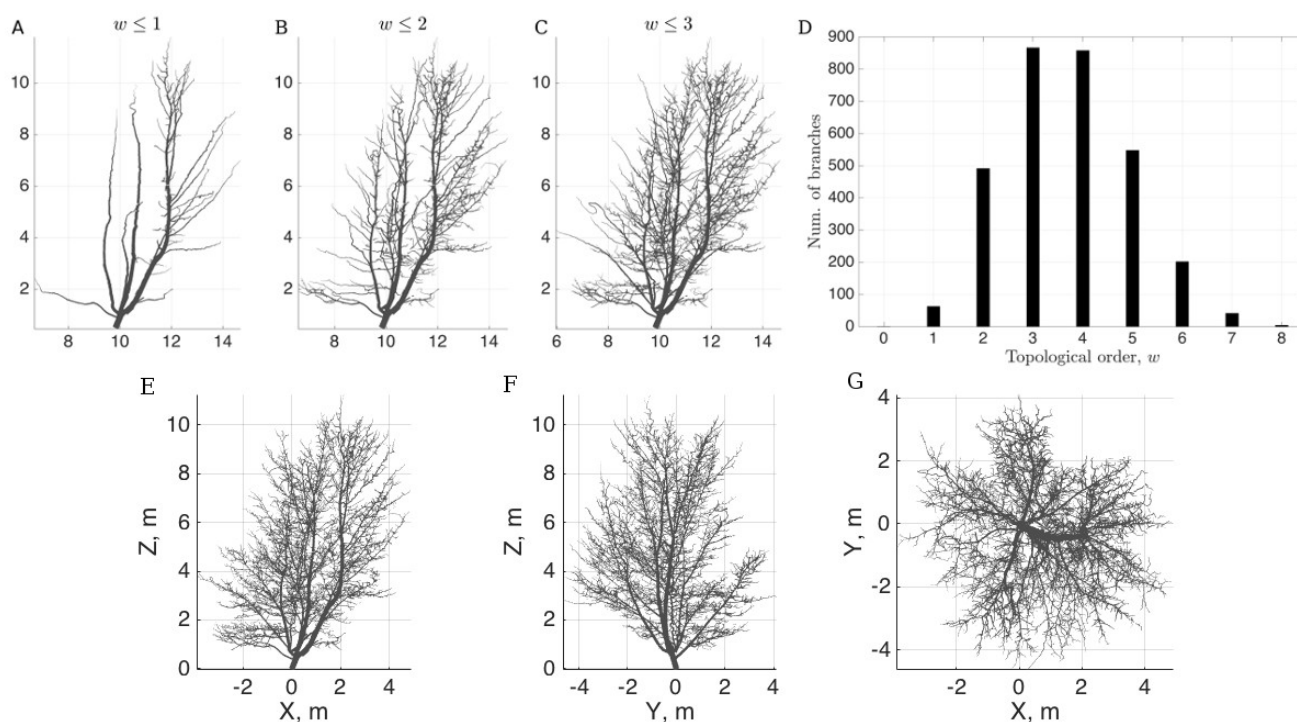

194

195 **Figure 2: The target QSM structure.** (A)  $w = 0, 1$ ; (B)  $w = 0, 1, 2$ ; (C)  $w = 0, 1, 2, 3$ ; (D) distribution  
196 of the topological orders  $w$  of the QSM. Full QSM tree: XZ-projection (E), YZ-projection (F), and  
197 XY-projection (G).

198

199 Another point to consider is the underlying statistical properties. For example, it is impossible to draw  
200 any branch statistics from the single instance of the trunk ( $w = 0$ ), while there are plenty of samples for  
201 the higher order branches. Given that the overall shape is mainly governed by the lower order  
202 branches, one must compromise between the main, shape determining branches with lower abundance  
203 and less important, but numerous, higher order branches (Fig. 2D).

204

205 Finally, the branch-related ( $B$ , see Materials and methods for the notation) data sets do not provide  
206 sufficient information for the width of the branches and their curvature in space. Moreover, although  
207 the  $B$  set has some information on the width ( $R_f$ ,  $L_t$ ), it is less abundant than the similar and more  
208 detailed information contained in the segment-related ( $S$ , see Materials and methods) data sets.  
209 However, the  $B$  data set has information on the structure of the emanating pattern of a branch, that is,  
210 the spatial location of its lateral buds/branching points ( $L_a$ ), and its angular properties, which, in turn,  
211 can be substituted with the biologically plausible growth algorithm.

212

213 Therefore, we begin our analysis with  $S^{0,1}$  data sets as  $w = 0, 1$  branches represent the main structural  
214 frame of the tree: without its valid approximation the whole tree cannot be considered fitted.

215

### 216 **Basic values of the parameters**

217

218 First, we run the optimization within each of the parameter groups  $I - V$  (see Materials and methods) to  
219 determine the basic values of the parameters. These basic values represent choices that generate a  
220 viable tree structure with proportions and scale approximately equal to those of the target QSM. Each  
221 optimization run takes the best parameters for the group optimized at the previous step. The target  
222 distributions  $U$  for these runs are  $S^{0,1}$ . Note that this exercise serves a basic exploration of the model's  
223 behavior, which can be (partially) replaced, for example, by the expert guesses for the parameter  
224 values or some calibration process (if the model is designed for specific purposes and/or species).

225

226 Second, based on these preliminary results we determine the most influential parameters for each of  
227 the group and combine them in a single optimization set up. Several independent optimization runs  
228 were taken in order to determine the most influential parameters. For example, we found that the  
229 angular properties vary the least among these runs, whereas the apical dominance requires subtler  
230 adjustments (as can be understood from the complex structure of the target QSM).

231

### 232 **Low order topological adjustment of the shape**

233

234 After these initial manipulations, we obtained a model with 11 parameters and good fit of the trunk and  
235 first order branches (Fig. 3C;  $d_h = 0.05$ ,  $d_g = 0.42$ ,  $d_c = 0.57$ ). However, the overall form of the  
236 resulting minimal score tree does not resemble the target QSM due to its rosette-shape (Fig. 3A, B). A  
237 closer look at the tree reveals that the higher order branches ( $w > 1$ ) are mainly responsible for the



238 formation of the rosette-shape of the tree, i.e. the orders which were not subject to the optimization  
 239 (Fig. 3). This example demonstrates the contribution of the higher order branches to the overall tree  
 240 shape, which suggests using the scatters of these orders in further optimization steps. Moreover, the  
 241 branch-related features, such as the angular properties of branches of order  $w > 1$ , were not captured  
 242 well (Fig. 3E), although similar order segment-related features show right stochastic tendencies (Fig.  
 243 3D) generated automatically by the growth algorithm of the SSM. This further stipulates usage of  $B$   
 244 scatters of orders  $w > 1$ .

245

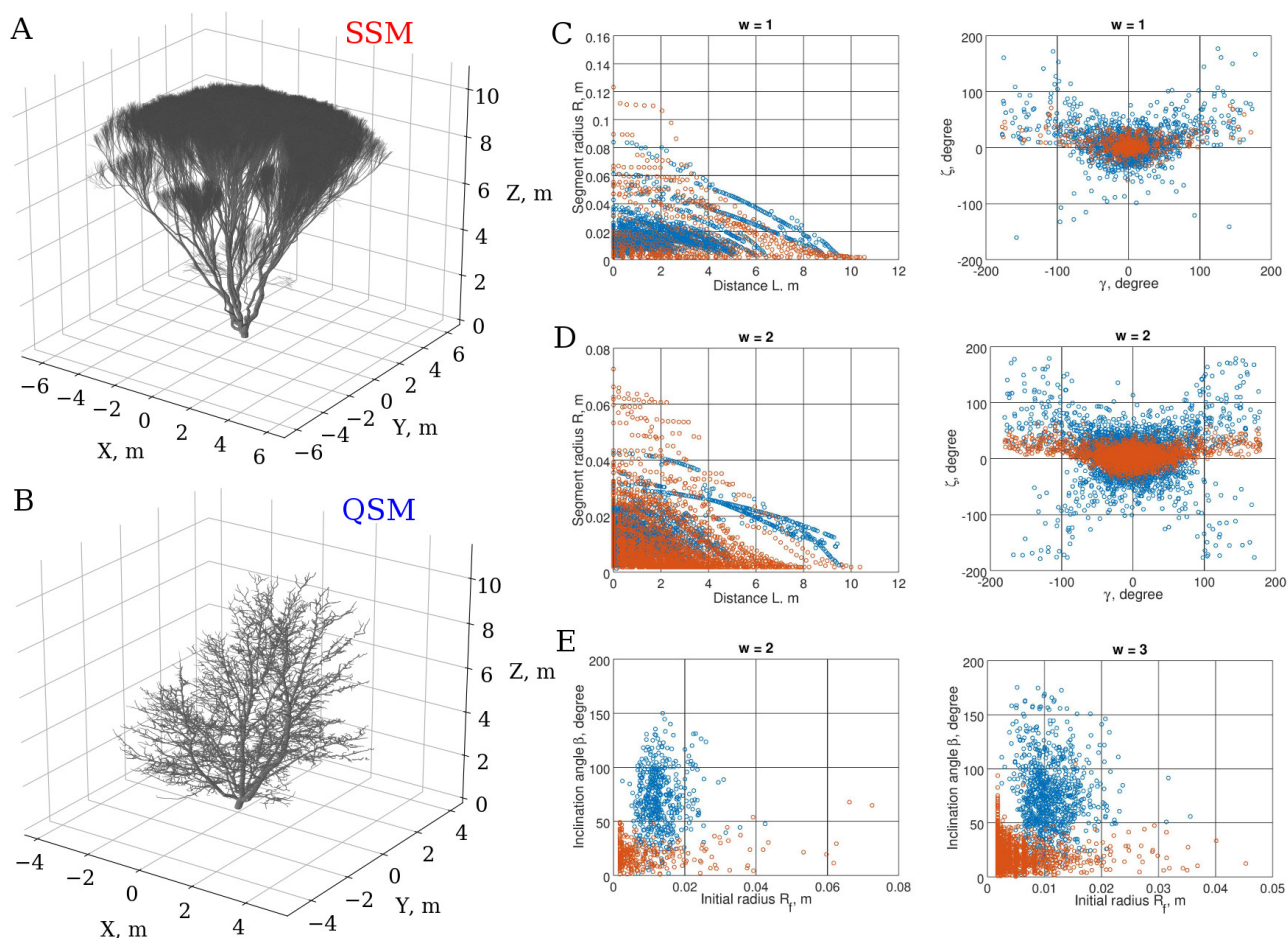

246

247 **Figure 3: The rosette-shape SSM resulting from the adjustment of the low order ( $S^{0,1}$ ) scatters.**

248 (A) The SSM tree; (B) the target QSM; (C) some  $S^{0,1}$  scatters used in the optimization; (D) higher  
 249 order ( $w = 2$ )  $S$ -scatters; (E) higher order ( $w = 2, 3$ )  $B$ -scatters. Note that the scatters in (D) and (E)  
 250 were not used in the optimization. SSM/QSM scatters are shown in red/blue.

251

252 **Higher order topological adjustment**

253

254 The increase in number of the structural feature tables is coupled with the increase in number of  
255 distinct distance values. Although the optimization of the mean distance value hinders the  
256 improvement for each target table, the low order as well as high order branches need to be fitted to the  
257 corresponding branches of the target QSM as we have shown above (Fig. 3). To reduce the number of  
258 distinct feature tables for the optimization we further utilize the merged data sets resulting in two joint  
259  $S$  and  $B$  tables for all topological orders (see Materials and methods).

260

261 Thus, we opted for  $S^{0,1}$  and  $B^{2,3,4}$  merged data sets in the next run of optimization to account for the  
262 higher order branch variability (Fig. 4,  $d_h = 0.08$ ,  $d_g = 0.20$ ,  $d_c = 0.68$ ). No longer we can see the  
263 rosette-shape due to the correct account of the angular properties of the higher order ( $w > 1$ ) branches  
264 (Fig. 4E). The poor convergence of the branch linear dimensions (radii, lengths etc.) present in the  
265 branch-related tables might be due to the parameter choice of the model. Namely, the small proportion  
266 of branches demonstrating right  $R_f$  values (Fig. 4E) appears to be the result of the fixed segment  
267 length, we opted for as a compromise between reality and computational complexity (the QSM  
268 minimal segment length is close to zero, median is 0.06 m). Noteworthy is the similar span of the  
269 curvature data points of SSM and QSM for  $w = 1, 2$  (Fig. C and D), although  $w = 2$  branch curvature  
270 was not subject to the optimization. Additionally, due to the lack of the orientation landmark in the  
271 feature data sets our best-fit SSM is fitted to the target QSM with accuracy of the rotation around Z-  
272 axis (this could be adjusted, for example, by associating South direction with a coordinate axis).

273

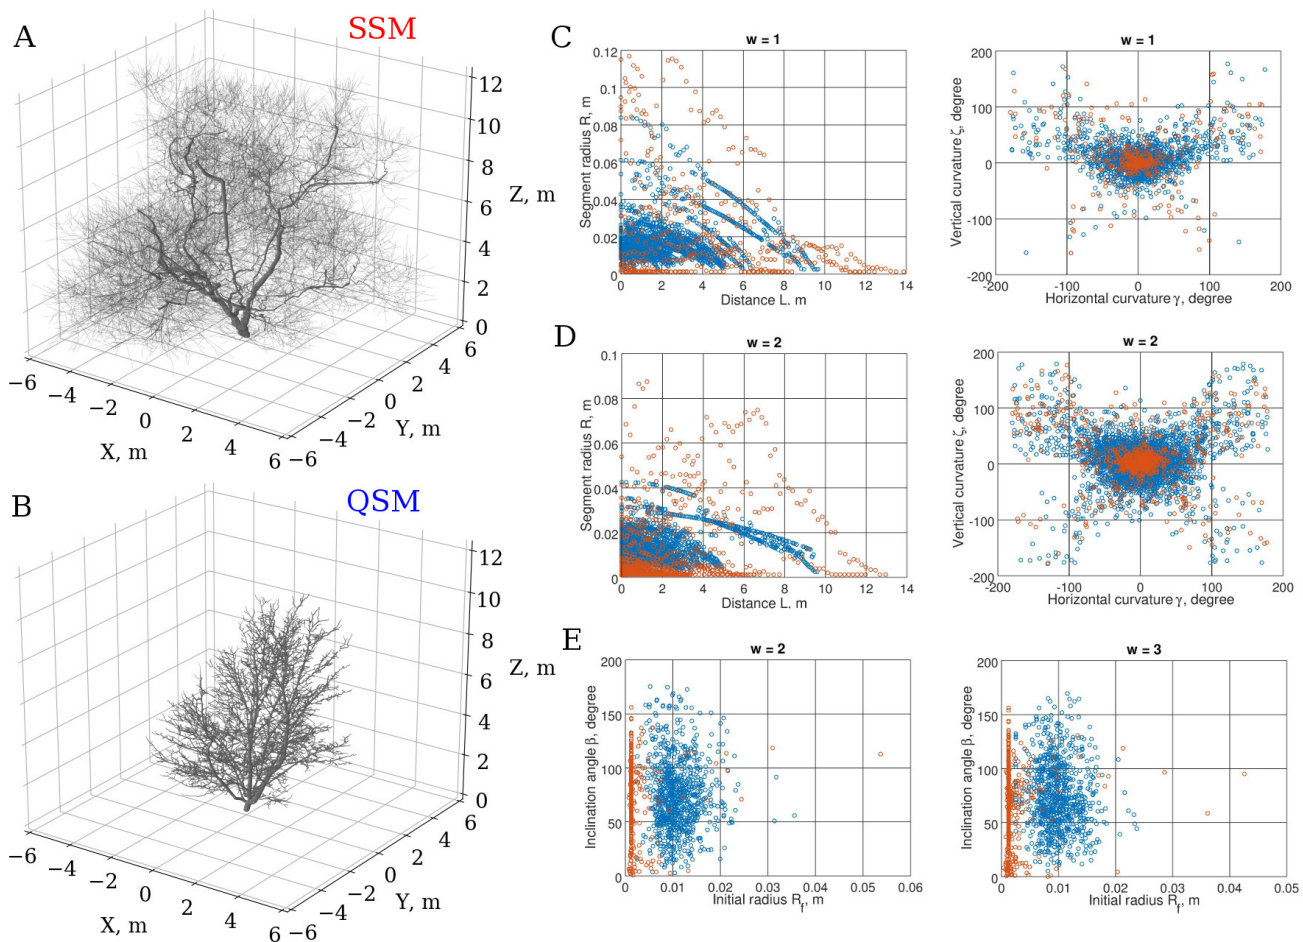

274

275 **Figure 4: Low and high order adjustment of the stochastic feature tables.** The best-fit SSM is  
 276 obtained through optimization against  $S^{0,1}$  and  $B^{2,3,4}$  merged feature data sets. (A) The best-fit SSM  
 277 tree, (B) the target QSM tree, (C) some projection scatters from  $S^1$ , (D)  $S^2$  projection scatters, (E)  $B^2$   
 278 and  $B^3$  projection scatters.

279

## 280 Clonal nature of the best-fit SSM

281

282 Due to the highly discrete and stochastic nature of the tree growth, the structural distance hyper-  
 283 surface in the space of the parameters is extremely abrupt (Fig. 5A). Hence, finding the global minima  
 284 of such surface is not a trivial task (the classical smooth function optimizers are not suitable in this  
 285 case, while stochastic discrete optimizers, like the genetic algorithm, seem to be more appropriate).  
 286 Moreover, the hyper-surface itself is a stochastic entity changing every time the new sample of random  
 287 numbers is used for a particular SSM growth realization. Therefore, any best-fit SSM is the best for a  
 288 particular realization of this stochastic process: one needs to study variability of the tree shape and the  
 289 chances are that other SSM growth realization can produce a lower distance value (Fig. 5B). We call  
 290 these many realizations of the SSM growth *morphological tree clones*.

291

292

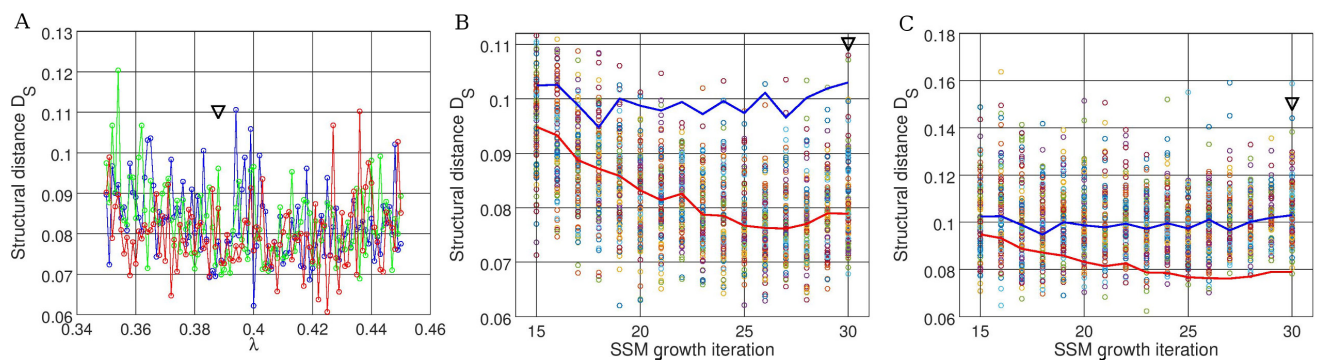

293 **Figure 5: Stochastic structure distance profiles in the parameter space.** (A) Three realizations of  
 294 the distance hyper-surface projection along a dimensionless parameter  $\lambda$  of the SSM, controlling the  
 295 apical dominance of a tree (the shown fragment of the projection with the step of 0.001 approximates  
 296 30% of the allowed variability of the parameter during optimization, which was [0.35, 0.65]). (B)  
 297 Structural distance ( $U = \{S^{0,1}, B^{2,3,4}\}$ ) values for 100 randomly generated SSM trees for each value of a  
 298 discrete SSM parameter, i.e. number of growth iterations (red line connects the median points of the  
 299 distance distributions for each parameter value; blue line shows the same median distance profile but  
 300 for the disturbed system from (C)). (C) Same as in (B), but  $U = S^{0,1}$  (blue line is the median profile; red  
 301 line is from (B)). The SSM is the best-fit SSM from Fig. 4; the black arrow indicates the parameter  
 302 value of the best-fit SSM.

303

304 The structural distance profile depends not only on the parameters of the SSM, but the choice of the  
 305 structural data sets. For example, in Fig. 5B and C the median distance profile is depicted given  $U =$   
 306  $\{S^{0,1}, B^{2,3,4}\}$  (red line) and  $U = S^{0,1}$  (blue line). In the given parameter span the latter seems to be more  
 307 flattened and lifted compared to the former. The addition of the  $B^{2,3,4}$  data set might be seen as a  
 308 perturbation to the distance profile changing the landscape properties (like minima). In our simulations  
 309 we maintain the global parameter boundaries, which allows for the search within the full available  
 310 space. However, we sequentially improve the model characteristics by perturbing the system, i.e.  
 311 changing the parameters, their intervals, and the  $U$  data sets to address problematic parts of the SSM  
 312 such that at every next optimization run the genetic algorithm is instructed to search around the  
 313 previous best point using the initial ranges (see Materials and methods).

314

315 Given the considerations above about the nature of the structural distance hyper-surface, the further  
 316 study of the morphological clones is needed. Specifically, the variability and plausibility of the clonal  
 317 shapes need to be addressed. For example, the clones must be further selected as to produce realistic  
 318 tree shapes (especially, when the general purpose SSM is used, like in this study), although we could

319 not find any unrealistic trees out of the best-fit SSM in our analysis. Additionally, the variability of the  
 320 clones is to be calibrated, for instance, by the analysis of the natural/QSM clonal individuals.

321

### 322 Morphological tree clones

323

324 The quintessence of our work is the generation of the morphological clones. In our pipeline, this  
 325 occupies the last stage (see Fig. 1, B5). After the optimization is finished and the best-fit SSM is  
 326 found, one can further randomize the outcome of SSM by letting the random number generator  
 327 produce different sequences every time SSM is run. As a result, the different realizations of SSM  
 328 should constitute the morphological clone generator yielding structural copies close to QSM and to  
 329 each other and *varying* in fine detail of organization of their branches. In other words, the coarse-grain  
 330 structure is repeated in each clone (and possibly grasps that of the target QSM), whereas the fine-grain  
 331 structure varies.

332

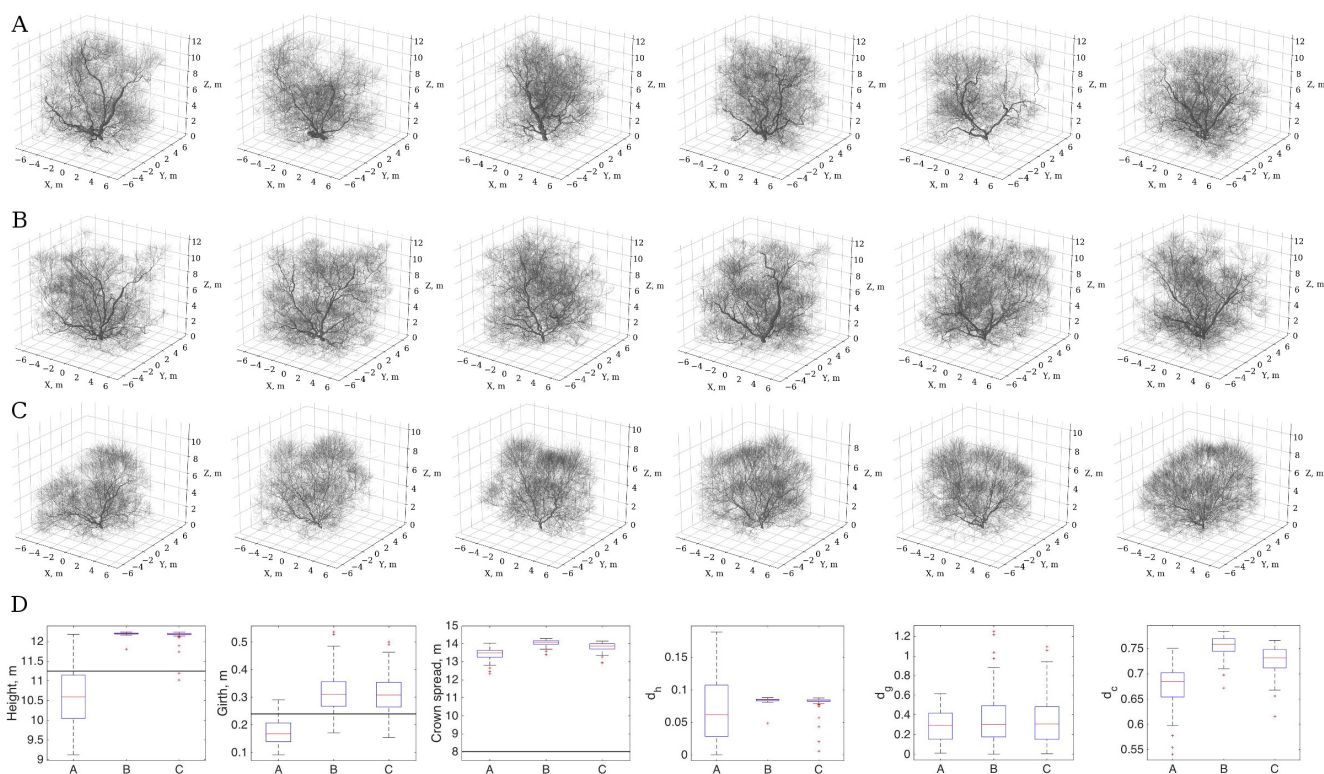

334 **Figure 6: Morphological clones generated from the best-fit SSM.** The best-fit SSM was found  
 335 using the higher topological order adjustments (Fig. 4) with number of growth iterations 30 (A), 26  
 336 (B), and 18 (C). The height, girth, crown spread, and classical metrics distributions are shown in (D)  
 337 for the clones in (A), (B), and (C) (the total number of generated clones for each case is  $n = 100$ ). The  
 338 black horizontal line indicates the corresponding measure of the target QSM.

339

340 We demonstrate visualization of six clones for three distinct cases in Fig. 6. One can see the fine-grain  
341 variation in the structure in each panel of the figure, although the overall (coarse-grain) structure is  
342 preserved and presumably captures that of the target maple QSM (Fig. 2). The three models are: the  
343 one found during the optimization process (Fig. 6A), the one minimizing the sample median distance  
344 profile for  $D_S(U = \{S^{0,1}, B^{2,3,4}\})$  shown in Fig. 5B and one minimizing the sample median profile  $D_S(U$   
345  $= S^{0,1})$  from Fig. 5C.

346

347 Out of 100 simulated clones for each case, we can see that the best-fit SSM obtained directly as the  
348 optimization outcome (Fig. 6A) produces larger proportion of individual trees exhibiting the three  
349 standard allometric measures closer to those of QSM (Fig. 6D). However, we argue that such simple  
350 description of a tree as using the allometric measures cannot be exhaustive enough to capture both the  
351 overall structure and its fine details.

352

353 The height statistics have the largest variability but by the visual inspection of the drawn clones in Fig.  
354 6 one can see that this variability does not exert significant alterations of the Z axis span and the trees  
355 seem to have even heights. Perhaps, the way we calculate the height of a tree produces such large  
356 deviations in each particular case, which makes it a non-robust estimator.

357

358 Similarly, the girth estimation, although being captured decently, produces large errors  $d_g$ , which  
359 seems to be a result of variation in its linear dimensions (Fig. 6D). The girth dimension spans a small  
360 proportion of the dimension of the whole tree: from several to tens of centimeters compared to meters  
361 of the whole tree. This makes the girth specific error look gigantic (exceeding in some cases 100%)  
362 and thus non-robust as well.

363

364 The crown spread measure shows significant variation (Fig. 6D). We believe that this takes place due  
365 to the environment of the real tree the QSM was reconstructed from, which was not modeled  
366 appropriately in the SSM. Namely, the environmental effects (positions relative to the sun, as the tree  
367 grows in the Northern country, animals, winds, neighboring trees etc.) might cause systematic  
368 influences exerted on the shape of the QSM tree. These influences were not accounted for in the SSM,  
369 which was allowed to grow in any direction, limited by the light conditions, existing branches of the  
370 same tree, and global boundaries of the available space. In addition to the environment influences,  
371 there are TLS measurement and QSM reconstruction errors, arising from the physical limitations of the  
372 instrumental technique and stochasticity of the QSM formation, respectively.

373

374 Finally, the true understanding of the variability of any measures of the morphological clones comes  
375 with the measurements of the real clones. Carrying out control experiments with QSM reconstructed  
376 from the real clonal individuals can only assess the variability. These real clone controlled  
377 experiments can further identify whether the obtained variability is large/small for the given  
378 species/clones and lead to the adjustment of the optimization parameters.

379

### 380 **Bayes-Forest toolbox**

381

382 We have further developed a unified interface using Matlab facilitating exploration, drawing,  
383 optimization, and simulation of SSM and QSM as well as study of the morphological tree clones. Our  
384 interface allows for faster and easier manipulation of the required data, models, and optimization  
385 routines from the Matlab Optimization Toolbox, using only the required elements of otherwise  
386 complex Matlab configuration for the analysis.

387

388 The Bayes-Forest toolbox is freely available at <http://math.tut.fi/inversegroup/app/bayesforest/v1/>. We  
389 also encourage the plant and computer scientists' community to expand their efforts using the toolbox  
390 with other species and models. Such a systematic approach can further be useful in tinkering the best  
391 options for creating QSM, SSM, and construction of the structural data sets.

392

### 393 **III. Discussion**

394

395 In this work, we described an algorithmic pipeline aimed at producing stochastic structural replicas, or  
396 morphological "clones", of trees from a QSM tree (data from TLS reconstruction) and a  
397 complimentary SSM tree (analytical/procedural growth model). The pipeline is based on an iterative  
398 minimization of a distance between morphological structures. The distance is based on construction of  
399 the structural data sets of the tree morphologies and subsequent measure of their discrepancy using the  
400 ideas of distribution tomography analysis. The resulting best-fit morphological clones are statistically  
401 similar which is expressed in overall similarity of their form (coarse-grain), but, nevertheless,  
402 difference in fine details of structural organization (fine-grain).

403

404 Here, we have shown the general logic behind the pipeline and principle possibility for generation of  
405 the morphological clones as defined above. For this purpose we used a highly variable procedural tree

406 model (Palubicki et al., 2009), which is more difficult to optimize. As the pipeline consists of several  
407 elementary steps, each of which can be changed according to the application and target analysis, we  
408 have proposed an initial set-up and basic configuration that are capable of the task we have set. We  
409 assume larger possibilities of exploration of the proposed configuration, let alone changing the steps  
410 and individual algorithms within the pipeline, which could be fulfilled by the community of plant  
411 science researchers (for this reason, we also created a little toolbox in Matlab for easier representation  
412 and simulation of the algorithm).

413

414 Developing the principles of the pipeline, we were interested in biological plausibility of the results  
415 rather than visualization purposes. Thus, for example, we use real TLS measurements and general-  
416 purpose measure of the distance, while omitting visual effects (e.g. shades, leaves etc.). We believe  
417 this pipeline can be useful in the rigorous analysis of the plant morphogenesis and corresponding  
418 applications (in contrast to some similar studies done in computer graphics field, e.g. (Stava et al.,  
419 2014)).

420

421 Moreover, in our algorithm we employ the distance measure taking into account significant portion of  
422 the data (in fact, all data points of a given topological order(s)), not merely scalar overall entities  
423 proposed by other authors (e.g. (Frank, 2010; Stava et al., 2014)). This allows for a more  
424 comprehensive analysis of forms and their description, stemming from the statistical inference theory  
425 and in the spirit of Systems Biology studies. Due to this reason, we do not rely on the traditional  
426 metrics comparison in this work as we found that similar values for the height, girth, and crown  
427 distances may correspond to different tree forms and, thus, be non-robust.

428

429 The robustness of the statistical analysis presented here can be enhanced by using several QSM trees.  
430 In this case, similarly looking trees should be used and the degree of similarity might be established  
431 using our definition of the structural distance. For example, the trunk features are more reliably  
432 reproduced in statistical sense, when several QSM's are used. In these lines, it might be stressed that  
433 other notions of "clone" can be used to establish relationship with morphology. Thus, the genetic  
434 clones might be utilized to establish to what degree the morphology of a tree is encoded into genes  
435 (nature vs. nurture problem).

436

437 In this initial study, we aimed at showing the plausibility of using our algorithm for effective  
438 morphology exploration. Many detailed studies scrutinizing the particulars of every part of our  
439 procedure wait to be accomplished. Among such particular questions are: QSM reconstruction



440 configuration and its impact on the algorithm, structural distance dependence on sample size, different  
441 ways of extraction of the morphological features of a tree, multiple comparison problem, calibration of  
442 the morphological clones with QSM for the real clonal trees, use of other optimization algorithms (e.g.  
443 multi-objective ones), addressing of the “unique solution” problem etc.

444

445

#### 446 **IV. Materials and methods**

447

##### 448 **Quantitative Structure Model (QSM)**

449

450 QSM is derived from the point cloud obtained by TLS. Essentially, QSM is a surface reconstruction of  
451 the branches of the real tree measured by TLS. The reconstruction itself is a stochastic process, giving  
452 different architecture results for different runs. Therefore, the reconstruction introduces internal errors  
453 in addition to the TLS measurement errors. Besides giving spatial locations of parts of the tree, QSM  
454 also reconstructs topological relations between the tree branches. The branches of QSM consist of  
455 elementary units, i.e. circular cylinders, but other geometrical primitives can also be applicable  
456 (Åkerblom et al., 2015). Thus, any potential structural information about the original tree can be  
457 approximated with high accuracy with QSM (details of the reconstruction algorithm are presented in  
458 (Raumonen et al., 2013) and (Calders et al., 2015), for the validation of the algorithm see (Kaasalainen  
459 et al., 2014; Calderys et al., 2015; Hackenberg et al., 2015; Raumonen et al., 2015)).

460

461 In this work, we use the reconstructed QSM of a maple tree (Fig. 2). The tree was measured in leaf-off  
462 conditions and our system consisted of a phase-based terrestrial laser scanner (Leica HDS6100 with a  
463 650–690 nm wavelength). The distance measurement accuracy and the point separation angle of the  
464 scanner were about 2–3 mm and 0.036 degrees, respectively. The horizontal distance of the scanner to  
465 the trunk was about 7–12 m, thus the average point density on the surface of the trunk (at the level of  
466 the scanner) for a single scan is about 2–5 points per square centimeter.

467

468 The QSM of the subject maple tree consists of 19,000 cylinders approximating 3,078 branches. The  
469 tree shape was chosen due to its non-trivial form and obvious irregularities in the tree growth. This is  
470 needed to determine whether the stochastic rules of SSM growth can account for this variability  
471 (which, in fact, might come from some deterministic sources, like constant wind, shading from the  
472 neighbors, animal influences etc., and which we do not know as we do not know the history of

473 growth). Thus, our algorithm tries to compensate the unknowns of the growth with simple stochastic  
474 rules of SSM and optimization of the stochastic distance function.

475

### 476 **Stochastic Structure Model (SSM)**

477

478 SSM is a simulated model, preferably based on analytical and/or heuristic rules for the tree growth;  
479 however, any viable algorithm for generating tree forms may be used. Importantly, the ultimate output  
480 of the SSM simulation is a table containing data sets  $U$  (see IV.3 Structural data sets), describing the  
481 tree structure.

482

483 Additionally, SSM may be supplied with stochastic variability in its parameter values. Through our  
484 studies we implement simple stochastic variations (in the form of normal and uniform distributions)  
485 added to the parameter values of SSM.

486

487 Finally, the elementary units forming the SSM branches should be similar to that of QSM for the  
488 appropriate comparison or, otherwise, any differences in the form primitives must be taken into  
489 account. Usually cylinders are used in SSM studies and they were also shown, when used in QSM, to  
490 produce most reliable estimation of the real tree characteristics (Åkerblom et al., 2015).

491

492 Examples of SSM are: *LIGNUM* (Perttunen et al., 1996) – a functional-structural plant model based on  
493 the physiological principles of growth of pine trees, but also applicable to other tree forms (Lu et al.,  
494 2011); *self-organizing tree model* (Palubicki et al., 2009) is based on the heuristic principles of growth,  
495 the algorithm is capable of producing various tree shapes and is used in computer graphics; *plastic*  
496 *trees* (Pirk et al., 2012) are procedural growth models used in computer graphics; *AMAP/GreenLab*  
497 (see e.g. (Reffye et al., 1997; Yan et al., 2004)) is a modeling approach to generate FSPM based upon  
498 empirical rules of growth with some physiological processes taken into account.

499

500 In this work, we use self-organizing tree model (SOT) with shadow propagation algorithm (Palubicki  
501 et al., 2009) as SSM with the minimal changes as to calculate the morphological features and produce  
502 the resulting data sets for comparison with QSM (in this work we used SOT implemented in the LPFG  
503 simulator, part of the VLAB software suite, version 4.4.0-2424 for 64-bit Mac OS, see  
504 [http://algorithmicbotany.org/virtual\\_laboratory/](http://algorithmicbotany.org/virtual_laboratory/)). This procedural tree model is fast and able to  
505 generate variety of forms, hence we can use it effectively to optimize the whole algorithm in respect to  
506 technical details as well as to cover various tree shapes. Note that more specialized tree growth models

507 designed for the species in question would be easier subjects for the morphology optimization, but,  
508 nevertheless, can be more valuable in biologically motivated studies (the usual choice is FSPM's, e.g.  
509 (Potapov et al., 2016)).

510

511 The total number of growth parameters of the model is 27: 23 are grouped, 4 are fixed for all times.  
512 The values of the latter are dictated both by suggestions of the authors in (Palubicki et al., 2009) and  
513 the compromise between computation time and details of the morphological description. For example,  
514 the segment length is 0.2 m (we found this optimal to grow a full size tree within a reasonable span of  
515 time, although this is not the minimum length of the target QSM segments), the voxel size is 0.2 m,  
516 and the model tree grows within 12x12x12 m cube from the center of XY plane of the cube (Z-axis is  
517 oriented upwards).

518

519 The grouped parameters are divided between 5 distinct groups corresponding to different related  
520 processes:

521 *Group I*: the initial growth parameters, including limiting values, and pipe model related parameters.

522 *Group II*: environmental effects such as sensing of the neighborhood shading, vertical gradient of the  
523 light, tropism etc.

524 *Group III*: apical dominance parameters.

525 *Group IV*: shadow propagation related constants (see (Palubicki et al., 2009)).

526 *Group V*: angular/branching properties.

527

## 528 **Structural data sets (U)**

529

530 Structural data sets for any given tree structure are empirical collections of the physical dimensions  
531 and spatial orientation measures of segments and branches that are composed of segments. These data  
532 sets must be similarly obtained for any pair of  $\{U_m, U_d\}$  that is to be compared by means of the distance  
533 algorithm.

534

535 Quantities in the data sets may represent scalar characteristics and/or relations between several  
536 covariates (e.g. radii, lengths, angles, tapering function of a branch etc.). On the one hand, one needs to  
537 exhaustively describe morphology of the tree using various geometrical and topological features. On  
538 the other hand, as the number of compared data sets  $\{U_m, U_d\}$  grows the efficiency of the optimization  
539 routine decreases, since the number of distance measures to be minimized grows correspondingly (one  
540 distance value for each pair  $\{U_m, U_d\}$ ). Thus, one needs more compact representation of the data. One

541 solution is to use bigger data sets with all possibly needed (for a given application) features. (Another  
 542 solution is to use multi-objective optimization routines finding, e.g. Pareto front, though we do not  
 543 employ such an approach in this work.) Therefore, we use larger tables of all measured features; hence,  
 544 one table represents a data set. However, we are unable to merge segment- and branch-related features  
 545 into a single table as these differ in dimension (Table 1). Thus, we usually compare the array of pairs  
 546  $\{U_m, U_d\}$ , having as a result the array of distance values, but with such larger table representation we  
 547 have smaller size of these arrays.

548

549 Branch- and segment-related data are described in Table 1 and Fig. 7. Throughout the manuscript we  
 550 maintain the notations  $B^w$  and  $S^w$  for the branch and segment-related data sets of the (Gravelius) order  
 551  $w$ , respectively. The zero order  $w$  is assigned to the trunk (a branch connecting the tree with the  
 552 ground). At the branching points, the lateral buds give rise to branches with order  $w+1$ , where  $w$  is the  
 553 order of the parent branch, while the apical buds continue the branch of the same order.

554

555 **Table 1: Branch and segment features.**

| Branch features, units  | Description                                                                                                         |
|-------------------------|---------------------------------------------------------------------------------------------------------------------|
| $\beta$ , degree        | Inclination angle of the branch, i.e. angle with its parent branch.                                                 |
| $\alpha$ , degree       | Azimuthal angle of the branch, i.e. angle around its parent branch (calculated from the fixed direction).           |
| $L_t$ , m               | Total length of the branch (calculated as the sum of the segment lengths constituting the branch).                  |
| $R_f$ , m               | Initial radius of the branch, i.e. radius of its first segment.                                                     |
| $L_a$ , m               | Length of over the parent branch from its beginning segment to the point where the current (child) branch emanates. |
| Segment features, units | Description                                                                                                         |
| $R$ , m                 | Radius of the segment.                                                                                              |
| $L$ , m                 | Distance from the beginning of the branch to the segment.                                                           |
| $\gamma$ , degree       | Angle between horizontal projections of the segment and its parent.                                                 |
| $\zeta$ , degree        | Angle between vertical projections of the segment and its parent.                                                   |

556

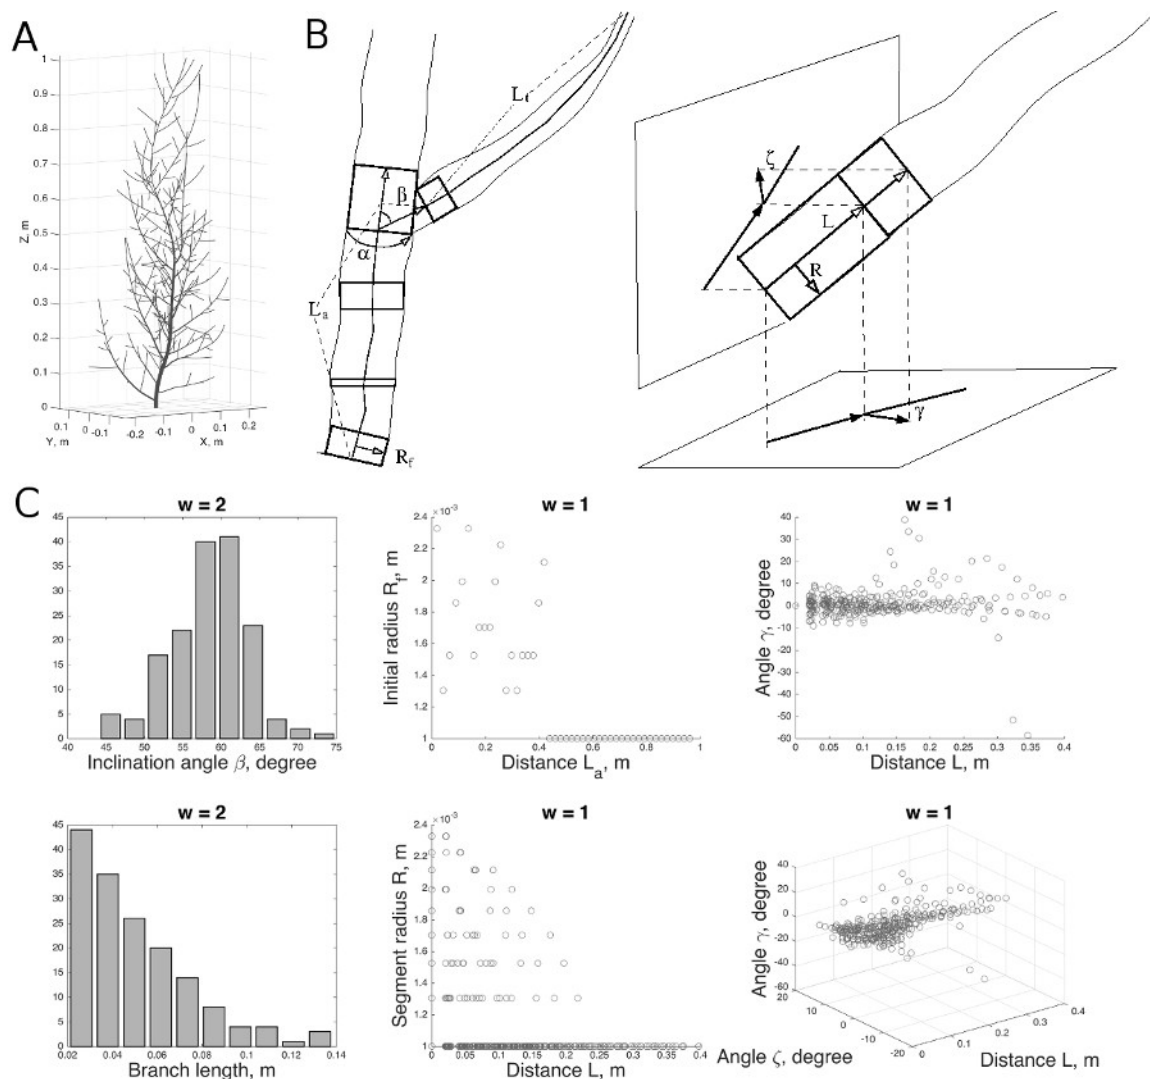

557 **Figure 7: Visual structure of a tree and its representation using the structural data sets  $U$ .** (A) A  
 558 sample tree; (B) geometrical features of the branch- and segment-related data sets; and (C) various  
 559 projections of the  $U$  data sets.

560 These features are not exhaustive and can be augmented at will, but we found this set sufficient for  
 561 obtaining realistic tree shape outcomes. Representation of the data sets in the form of big branch and  
 562 segment related tables reduces the complexity of optimization process by reducing the number of  
 563 distance values to minimize. Additionally, such representation of the data allows for the fast extraction  
 564 of all required relations between covariates or scalar entities without having them as separate data sets.  
 565

566 In a simulated SSM structure the extraction of topological relations between branches is  
 567 straightforward as the user observes the whole process of growth: the lateral buds start the next order  
 568 and apical buds continue the current order. However, this is not the case with QSM since it is a time  
 569 snapshot of a tree form that does not retain the history of the tree growth. Thus, the reconstruction

570 algorithm requires other principles for extraction of topology. Although the reconstruction algorithm  
571 defines a complicated procedure that outlines the topology of a tree, it could be roughly approximated  
572 by the following rule: at branching points the thickest branch is the continuation of the same order  $w$ ,  
573 while thinner branches are lateral expansions of the order  $w + 1$  (Raumonen et al., 2013). For the  
574 species with weak apical dominance (shrubby trees) we maintain similar procedure when simulating  
575 corresponding SSM (for the species with strong apical dominance, both techniques should converge to  
576 the same result).

577

578 Finally, it is possible to merge the corresponding data sets of the same order, which results at  
579 maximum in two large data sets of branch- and segment-related features, respectively. While this  
580 simplifies the search of the distance minimum (max two values to minimize), this technique must be  
581 used with care as in this case one heavily relies upon the growth rules of SSM. If these rules are not  
582 based on biologically motivated rules, SSM can produce highly unrealistic tree forms as the “best-fit”,  
583 since there is a possibility to mix the features of different topological orders. For example, the  
584 branches of higher order could be much thicker than those of the lower order, which is unrealistic and  
585 naturally is taken care of in the biologically based growth algorithms (e.g. pipe model).

586

### 587 **Measure of structural distance ( $D_S$ )**

588

589 The distance  $D_S$  between any two data sets, or empirical distributions (dimension or number of  
590 variables of which is not limited), measures the difference between the local densities of the points in  
591  $U$ -space for these data sets. Here, it is constructed by measuring SSM vs. QSM difference of the  
592 normalized cumulative distributions of the point densities projected onto a number of line directions in  
593 the coordinate space of the variables in  $U$ . The directions of lines are generated with quasi-Monte  
594 Carlo method using low-discrepancy (quasi-/sub-random) sequences, which cover the given space  
595 more evenly than uniformly generated sequences. The difference between the projected cumulative  
596 distributions is further measured by the Kolmogorov-Smirnov statistic (any other can be used) and the  
597 resulting distance between the two data sets  $U$  is an average of all statistics calculated from each of the  
598 lines (see Fig. 8A).

599

600 In general,  $U \in R^N$ , in our case  $N = 4$  (segment) or  $N = 5$  (branch) as can be seen from Table 1. The  
601 empirical probability density function  $p(U)$  can be approximated by the series of 1D density functions  
602  $p_{1D}(U,L)$ , where  $L$  is a line in  $R^N$ , each of these 1D functions is constructed by projecting all the data

603 points of  $U$  (thus, it is not a marginal distribution) onto a line  $L$  (in total we use 1000 such line  
 604 directions formed quasi-randomly). Cumulative distributions  $P_{1D}(U_m, L_i)$  and  $P_{1D}(U_d, L_i)$  for each line  
 605 direction  $L_i$  are compared, thus, for any given data set pair  $\{U_m, U_d\}$  the resultant distance value is:

$$D_S(U_m, U_d) = \frac{1}{n} \sum_{i=1}^n K[P_{1D}(U_m, L_i), P_{1D}(U_d, L_i)],$$

606 where  $n$  is the number of lines and operator  $K[\cdot, \cdot]$  returns the Kolmogorov-Smirnov statistic for the  
 607 given pair of 1D empirical cumulative distributions.

608

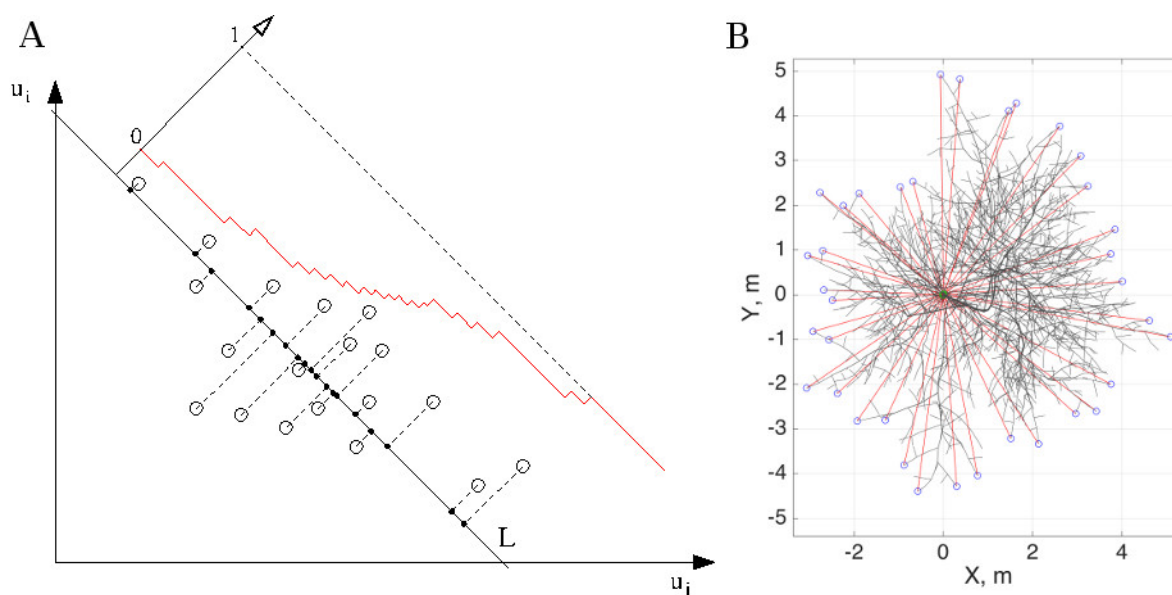

609

610 **Figure 8: Distribution tomography of the structural data sets (A) and classical metric for the**

611 **crown spread (B).** (A) Data points in  $U$  (projected here for simplicity onto  $(u_i, u_j)$  plane) are used to

612 construct the projection onto a line  $L$ . Cumulative empirical distribution is calculated along  $L$  (red).

613 Only one line is shown, although typically one should use sufficiently enough number of lines to

614 describe the form of the distribution. (B) Top view of a tree: spokes (red) emanate from the ground

615 segment (green) extending up to the most distant points (blue).

616

617 **Traditional metrics ( $d_x$ ).** In order to provide a reference to traditional tree measurement systems, we

618 also calculate three main tree characteristics that are used for describing a tree shape (Frank, 2010).

619 *Height* is calculated as the highest point of a tree. *Girth* is calculated as the diameter of the ground

620 segment (the breast-height diameter is not appropriate for the shrubby trees). *Crown spread* is

621 calculated as follows. First, on XY-plane (top view, Fig. 8B) the set of spokes (red lines in Fig. 8B)

622 emanating from the center of a tree (the ground segment, green circle) is formed (here, we opted for

623 the spokes with azimuthal separation of 10 degrees). Then the length of each spoke is calculated as a

624 distance from the tree center to the most distant point of the crown in the direction of the spoke (blue  
625 circles). The crown spread is twice an average of all spokes of a tree.

626

627 Finally, when comparing two tree shapes we calculate the distances as follows:

$$d_h = \frac{|h_d - h_m|}{h_d}; d_g = \frac{|g_d - g_m|}{g_d}; d_c = \frac{|c_d - c_m|}{c_d}.$$

628 In this,  $h_d$ ,  $g_d$ , and  $c_d$  are the height, girth, and crown spread of the QSM tree, respectively, whereas  $h_m$ ,  
629  $g_m$ , and  $c_m$  are the corresponding entities of the best-fit SSM tree. Thus, the classical distance  $d_x$  shows  
630 how large is the difference between entities  $x$  in proportion of the corresponding reference/QSM tree  
631 value.

632

### 633 **Optimization routine**

634

635 The measure of structural distance  $D_S(U_m, U_d)$  is minimized by adjusting the parameters  $\nu$  of SSM.

636 In principle (with infinite sampling),  $D_S = 0$  for two trees (or, more precisely, infinitely large groups of  
637 stochastically varying trees) that have exactly the same parameters  $\nu$ . These trees are not copies of each  
638 other, but they are structurally (statistically) similar. The choice of the  $U$  defining  $D_S$  is not unique, but  
639 ideally well-chosen  $U$  should satisfy the following uniqueness condition for  $D_S$  to yield an acceptable  
640 measure of distance. Let three trees be given by  $\nu_A$ ,  $\nu_B$ , and  $\nu_C$ . Then, if  $D_S(U_A, U_B) < D_S(U_A, U_C)$ , one  
641 can update  $C \leftarrow B$ , find any new  $\nu_B$  for which the inequality holds, and repeat until  $D_S(U_A, U_B) \rightarrow 0$  and  
642  $\nu_B \rightarrow \nu_A$ . In practice, this should be true in a large enough neighborhood of  $\nu_A$  (any steps down the right  
643 valley lead to its bottom); however,  $D_S > 0$  due to the finite sampling and insufficient model.

644

645 Any algorithm from a standard optimization library (e.g. Matlab Optimization Toolbox) that finds a  
646 minimum of an objective function ( $D_S = F(\nu)$ ) can be used. However, to facilitate global minimum  
647 search and given the nature of the problem we use the genetic algorithm (implemented in Matlab,  
648 version R2015b). Additionally, some parameters of SSM may take only integer values, so the genetic  
649 algorithm handles the integer parameters correctly unlike, for example, the classical steepest decent  
650 algorithm. The genetic algorithm iteratively finds a minimum of  $D_S$ , each iteration being called  
651 *generation*. Each generation is characterized with a number of individuals, i.e. *population*; one  
652 individual is equivalent to one set of the parameter values. The variation is controlled by the *crossover*  
653 *rate* (rate of recombination of the population parameters) and *mutation rate* (rate of introduction of the  
654 new variability into the population). The former is fixed to 80% in the Matlab Optimization Toolbox,  
655 whereas the latter is controlled by our configuration. Ranges of the parameters are given by the user.



656 There are two types of ranges: *global* lower and upper boundaries for each of the parameter values and  
657 *initial range*, from which the algorithm tries to construct the initial population (and, perhaps, where the  
658 best solution lies). The latter controls the convergence rate: if it is too broad poor convergence is  
659 attained. Finally, algorithm stops when there have passed a fixed number of generations without  
660 improving the distance.

661

662 Thus, the objective function takes the input parameters  $v$ , simulates SSM with  $v$ , calculates and returns  
663 structural data sets  $U_m$ . Subsequently, the objective function calculates  $D_S(U_m, U_d)$  and returns it to the  
664 optimization routine. The SSM, being a stochastic model, *must* have a fixed random generator seed  
665 during optimization, i.e. the same input parameter set must produce the same structural output. This is  
666 needed for convergence of the optimization. After obtaining the final best-fit form of SSM, one can  
667 further explore the variability coming from different random number sequences used in the SSM  
668 simulations (in addition to Matlab, we used GNU Octave version 4.2.0 for clone generation, see  
669 <http://www.gnu.org/software/octave/doc/interpreter/>). Thus, such random best-fit SSM is capable of  
670 producing the clonal morphologies (the same overall structure with varying details of organization),  
671 which is the main goal of our algorithm.

672

673

#### 674 **Acknowledgments**

675 We would like to thank Risto Sievänen and Wojtek Palubicki for useful discussion and comments on  
676 the model design and implementation.

677

678

#### 679 **Competing interests**

680 No competing interests declared.

681

#### 682 **Author contributions**

683 IP performed all simulations, processed the data, and wrote the manuscript; MJ wrote the code for  
684 calculating the structural distance, discussed the results; MÅ contributed to BayesForest Toolbox; PR  
685 generated and provided for the QSM data, wrote the manuscript and discussed the results; MK  
686 conceived the study, discussed the results, and wrote the manuscript.

687

#### 688 **Funding**

689 This work was supported by the Academy of Finland (Center of Excellence in Inverse Problem  
690 Research).

691

## 692 **Data availability**

693 All data needed to reproduce the results of this study as well as some additional materials and Bayes-  
694 Forest Toolbox are available at: <http://math.tut.fi/inversegroup/app/bayesforest/v1/>. The most recent  
695 version of the Toolbox is also available at: <http://github.com/inuritdino/BayesForest> (this interface is  
696 preferred for the contributors).

697

## 698 **List of Symbols and Abbreviations**

699 FSPM – functional-structural plant model.

700 QSM – quantitative structure model.

701 SSM – stochastic structure model.

702 SOT – self-organizing tree model.

703 TLS – terrestrial laser scanning.

704

## 705 **References**

706

707 Åkerblom, M., Raunonen, P., Kaasalainen, M., Casella, E. (2015). Analysis of Geometric  
708 Primitives in Quantitative Structure Models of Tree Stems. *Remote Sensing* **7**(4): 4581-4603.

709 Bracewell, R. (1990). Numerical Transforms. *Science* **248**: 697-704.

710 Calders, K., Newnham, G., Burt, A., Murphy, S., Raunonen, P., Herold, M., Culvenor, D.,

711 Avitabile, V., Disney, M., Armston, J., and Kaasalainen, M. (2015). Nondestructive estimates of  
712 above-ground biomass using terrestrial laser scanning. *Methods in Ecol Evol* **6**: 198-208.

713 Fourcaud, T., Zhang, X., Stokes, A., Lambers, H., and Körner, C. (2008). Plant Growth Modelling  
714 and Applications: The Increasing Importance of Plant Architecture in Growth Models.

715 *Ann Bot.* **101**(8): 1053-1063.

716 Frank, E. (2010). A Numerical Method of Plotting Tree Shapes. *Bull East Nat Tree Soc* **6**(1): 2-8.

717 Godin, C., Hanan, J., Kurth, W., Lacoïnte, A., Takenaka, A., Prusinkiewicz, P., DeJong, T.,  
718 Beveridge, C., and Andrieu, B., editors (2004). Proceedings of the 4th International Workshop on  
719 Functional–Structural Plant Models, June 7-11, Montpellier, France.

720 Hackenberg, J., Spiecker, H., Calders, K., Disney, M., and Raunonen, P. (2015). SimpleTree - an  
721 efficient open source tool to build tree models from TLS clouds. *Forests* **6**(11): 4245-4294.

- 722 **Hallé, F., Oldeman, R., and Tomlinson P.** (1978). *Tropical trees and forests: An architectural*  
723 *analysis*. Berlin: Springer.
- 724 **Kaasalainen, M.** (2008). Dynamical Tomography of Gravitationally Bound Systems. *Inverse*  
725 *Problems and Imaging* **2**: 527–546.
- 726 **Kaasalainen, S., Krooks, A., Liski, J., Raunonen, P., Kaartinen, H., Kaasalainen, M., Puttonen,**  
727 **E., Anttila, K., and Mäkipää, R.** (2014). Change Detection of Tree Biomass with Terrestrial Laser  
728 Scanning and Quantitative Structure Modeling. *Remote Sensing* **6**: 3906-3922.
- 729 **Lacointe A.** (2000). Carbon allocation among tree organs: a review of basic processes and  
730 representation in functional–structural tree models. *Ann For Sci* **57**:521-533.
- 731 **Livny, Y., Yan, F., Olson, M., Chen, B., Zhang, H., and El-Sana, J.** (2010). Automatic  
732 Reconstruction of Tree Skeletal Structures from Point Clouds. *ACM Transactions on Graphics* **29**(6):  
733 151:1-8.
- 734 **Lu, M., Nygren, P., Perttunen, J., Pallardy, S., Larsen, D.** (2011). Application of the functional-  
735 structural tree model LIGNUM to growth simulation of short-rotation eastern cottonwood. *Silva*  
736 *Fennica* **45**(3): 431–474.
- 737 **Mäkelä, A. and Hari, P.** (1986). Stand growth model based on carbon uptake and allocation in  
738 individual trees. *Ecol Model* **33**: 204-229.
- 739 **Palubicki, W., Horel, K., Longay, S., Runions, A., Lane, B., Mech, R., and Prusinkiewicz, P.**  
740 (2009). Self-organizing tree models for image synthesis. *ACM Transactions on Graphics* **28**(3): 58:1-  
741 10.
- 742 **Perttunen, J., Sievänen, R., Nikinmaa, E., Salminen, H., Saarenmaa, H., Väkevä, J.** (1996).  
743 LIGNUM: a tree model based on simple structural units. *Ann Bot* **77**: 87-98.
- 744 **Pirk, S., Stava, O., Kratt, J., Abdul Massih Said, M., Neubert, B., Mech, R., Benes, B., and**  
745 **Deussen, O.** (2012). Plastic Trees: Interactive Self-Adapting Botanical Tree Models. *ACM*  
746 *Transactions on Graphics* **31**(4): 50:1-50:10.
- 747 **Potapov, I., Järvenpää, M., Åkerblom, M., Raunonen, P., and Kaasalainen M.** (2016). Data-  
748 based stochastic modeling of tree growth and structure formation. *Silva Fennica* **50**(1), 1413.
- 749 **Preuksakarn, C., Boudon, F., Ferraro, P., Durand, J.B., Nikinmaa, E., Godin, C.** (2010).  
750 Reconstructing Plant Architecture from 3D Laser scanner data. In: Proceedings of the 6th International  
751 Workshop on Functional-Structural Plant Models, 14-16.
- 752 **Prusinkiewicz, P.** (2004). Modeling plant growth and development. *Current Opinion in Plant Biology*.  
753 **7**(1): 79-83.

- 754 **Raumonen, P., Kaasalainen, M., Åkerblom, M., Kaasalainen, S., Kaartinen, H., Vastaranta, M.,**  
755 **Holopainen, M., Disney, M., and Lewis P.** (2013). Fast Automatic Precision Tree Models from  
756 Terrestrial Laser Scanner Data. *Remote Sensing* **5**: 491-520.
- 757 **Raumonen, P., Casella, E., Calders, K., Murphy, S., Åkerblom, M., and Kaasalainen, M.** (2015).  
758 Massive-scale Tree Modelling from TLS Data. *ISPRS Annals of the Photogrammetry, Remote Sensing*  
759 *and Spatial Information Sciences*, Volume II-3/W4, 189-196.
- 760 **Rauscher, H., Isebrands, J., Host, G., Dickson, R., Dickmann, D., Crow, T., and Michael D.**  
761 (1990). ECOPHYS: An ecophysiological growth process model for juvenile poplar. *Tree Physiol* **7**:  
762 255-281.
- 763 **Reffye de, P., Fourcaud, T., Blaise, F., Barthelemy, D., Houllier, F.** (1997). A functional model of  
764 tree growth and tree architecture. *Silva Fennica*. 1997; 31(3): 297-311.
- 765 **Room, P., Hanan, J., and Prusinkiewicz, P.** (1996). Virtual plants: new perspectives for ecologists,  
766 pathologists and agricultural scientists. *Trends Plant Sci* **1**:33-38.
- 767 **Rosell, J., Llorens, J., Sanz, R., Arnó, J., Ribes-Dasi, M., Masip, J., Escolà, A., Camp, F.,**  
768 **Solanelles F., Gràcia, F. et al.** (2009). Obtaining the three-dimensional structure of tree orchards from  
769 remote 2D terrestrial LIDAR scanning. *Agric and For Meteor* **149**: 1505-1515.
- 770 **Rutzinger, M., Pratihast, A., Oude Elberink, S., and Vosselman, G.** (2010). Detection and  
771 modelling of 3D trees from mobile laser scanning data. In: *International Archives of Photogrammetry,*  
772 *Remote Sensing and Spatial Information Sciences XXXVIII*: 520-525.
- 773 **Sachs, T. and Novoplansky, A.** (1995). Tree from: architectural models do not suffice. *Israel J Plant*  
774 *Sci* **43**: 203–212.
- 775 **Sievänen, R., Nikinmaa, E., Nygren, P., Ozier-Lafontaine, H., Perttunen, J., Hakula, H.** (2000).  
776 Components of functional–structural tree models. *Ann Sci* **57**:399-412.
- 777 **Sievänen, R., Perttunen, J., Nikinmaa, E., Kaitaniemi, P.** (2008). Toward extension of a single tree  
778 functional-structural model of Scots pine to stand level: effect of the canopy of randomly distributed,  
779 identical trees on development of tree structure. *Functional Plant Biology* **35**: 964–975.
- 780 **Smith, A., Astrup, R., Raumonen, P., Liski, J., Krooks, A., Kaasalainen, S., Åkerblom, M., and**  
781 **Kaasalainen M.** (2014). Tree Root system characterization and volume estimation by terrestrial laser  
782 scanning. *Forests* **5**(12): 3274-3294.
- 783 **Stava, O., Pirk, S., Kratt, J., Chen, B., Mech, R., Deussen, O., and Benes, B.** (2014). Inverse  
784 Procedural Modelling of Trees. *Computer Graphics Forum* **33**(6): 118-131.
- 785 **Van Leeuwen, M. and Nieuwenhuis, M.** (2010). Retrieval of forest structural parameters using lidar  
786 remote sensing. *Eur J For Res* **129**: 749–770.

787 **Xu, H., Gossett, N., and Chen, B.** (2007). Knowledge and Heuristic Based Modeling of Laser-  
788 Scanned Trees. *ACM Transactions on Graphics* **26**(4): 19.

789 **Yan, H., Kang, M., de Reffye, P., Dingkuhn, M.** (2004). A Dynamic, Architectural Plant Model  
790 Simulating Resource-dependent Growth. *Annals of Botany*. 2004; 93: 591-602.

791

792

## 793 **Figure legends**

794

795 **Figure 1: The algorithm outline (see explanation in the text).**

796

797 **Figure 2: The target QSM structure.** (A)  $w = 0, 1$ ; (B)  $w = 0, 1, 2$ ; (C)  $w = 0, 1, 2, 3$ ; (D) distribution  
798 of the topological orders  $w$  of the QSM. Full QSM tree: XZ-projection (E), YZ-projection (F), and  
799 XY-projection (G).

800

801 **Figure 3: The rosette-shape SSM resulting from the adjustment of the low order ( $S^{0,1}$ ) scatters.**  
802 (A) The SSM tree; (B) the target QSM; (C) some  $S^{0,1}$  scatters used in the optimization; (D) higher  
803 order ( $w = 2$ )  $S$ -scatters; (E) higher order ( $w = 2, 3$ )  $B$ -scatters. Note that the scatters in (D) and (E)  
804 were not used in the optimization. SSM/QSM scatters are shown in red/blue.

805

806 **Figure 4: Low and high order adjustment of the stochastic feature tables.** The best-fit SSM is  
807 obtained through optimization against  $S^{0,1}$  and  $B^{2,3,4}$  merged feature data sets. (A) The best-fit SSM  
808 tree, (B) the target QSM tree, (C) some projection scatters from  $S^1$ , (D)  $S^2$  projection scatters, (E)  $B^2$   
809 and  $B^3$  projection scatters.

810

811 **Figure 5: Stochastic structure distance profiles in the parameter space.** (A) Three realizations of  
812 the distance hyper-surface projection along a dimensionless parameter  $\lambda$  of the SSM, controlling the  
813 apical dominance of a tree (the shown fragment of the projection with the step of 0.001 approximates  
814 30% of the allowed variability of the parameter during optimization, which was [0.35, 0.65]). (B)  
815 Structural distance ( $U = \{S^{0,1}, B^{2,3,4}\}$ ) values for 100 randomly generated SSM trees for each value of a  
816 discrete SSM parameter, i.e. number of growth iterations (red line connects the median points of the  
817 distance distributions for each parameter value; blue line shows the same median distance profile but  
818 for the disturbed system from (C)). (C) Same as in (B), but  $U = S^{0,1}$  (blue line is the median profile; red

819 line is from (B)). The SSM is the best-fit SSM from Fig. 4; the black arrow indicates the parameter  
820 value of the best-fit SSM.

821

822 **Figure 6: Morphological clones generated from the best-fit SSM.** The best-fit SSM was found  
823 using the higher topological order adjustments (Fig. 4) with number of growth iterations 30 (A), 26  
824 (B), and 18 (C). The height, girth, crown spread, and classical metrics distributions are shown in (D)  
825 for the clones in (A), (B), and (C) (the total number of generated clones for each case is  $n = 100$ ). The  
826 black horizontal line indicates the corresponding measure of the target QSM.

827

828 **Figure 7: Visual structure of a tree and its representation using the structural data sets  $U$ .** (A) A  
829 sample tree; (B) geometrical features of the branch- and segment-related data sets; and (C) various  
830 projections of the  $U$  data sets.

831

832 **Figure 8: Distribution tomography of the structural data sets (A) and classical metric for the**  
833 **crown spread (B).** (A) Data points in  $U$  (projected here for simplicity onto  $(u_i, u_j)$  plane) are used to  
834 construct the projection onto a line  $L$ . Cumulative empirical distribution is calculated along  $L$  (red).  
835 Only one line is shown, although typically one should use sufficiently enough number of lines to  
836 describe the form of the distribution. (B) Top view of a tree: spokes (red) emanate from the ground  
837 segment (green) extending up to the most distant points (blue).

838
